# Supplementary material
Source: PubMed Central journal article supplement (PMC4664125)

**Supplemental Table e-1. Association of CAA with decline in 5 specific cognitive systems\***

|                      | Episodic Memory<br>beta (SE), p | Perceptual Speed<br>beta (SE), p | Visuospatial abilities<br>beta (SE), p | Working Memory<br>beta (SE), p | Semantic Memory<br>beta (SE), p |
|----------------------|---------------------------------|----------------------------------|----------------------------------------|--------------------------------|---------------------------------|
| Age at death         | -0.0008 (.0007), 0.235          | .0007 (.0007), 0.292             | .0007 (.0006), 0.219                   | -0.0002 (.0006), 0.688         | .0009 (.0008), 0.909            |
| Male Sex             | 0.015 (0.010), 0.120            | 0.017 (0.009), 0.059             | 0.016 (0.008), 0.037                   | 0.001 (0.008), 0.881           | -0.004 (0.011), 0.695           |
| Education            | 0.0005 (0.001), 0.666           | 0.001 (0.001), 0.236             | -0.00006 (0.001), 0.950                | 0.001 (0.001), 0.154           | 0.0006 (0.001), 0.668           |
| AD                   | -0.106 (0.008), <.0001          | -0.064 (0.007), <.0001           | -0.043 (0.006), <.0001                 | -0.060 (0.006), <.0001         | -0.102 (0.008), <.0001          |
| Macroscopic infarcts | -0.026 (0.006), <.0001          | -0.018 (0.006), 0.002            | -0.015 (0.005), 0.001                  | -0.022 (0.005), <.0001         | -0.016 (0.007), 0.016           |
| Microinfarcts        | -0.001 (0.007), 0.828           | -0.008 (0.007), 0.195            | -0.002 (0.005), 0.718                  | -0.003 (0.005), 0.534          | -0.009 (0.007), 0.251           |
| Lewy Bodies          | -0.035 (0.010), 0.0007          | -0.048 (0.010), <.0001           | -0.025 (0.008), 0.002                  | -0.022 (0.005), 0.0005         | -0.052 (0.012), <.0001          |
| CAA                  | -0.012 (0.004), 0.006           | -0.010 (0.004), 0.032            | -0.005 (0.003), 0.148                  | -0.005 (0.003), 0.115          | -0.019 (0.005), <.0001          |

\*derived from separate linear mixed effects models

### Supplemental Figure e-1. Distribution of CAA pathology

Representative cortical areas demonstrating amyloid angiopathy, grades 1-4. (A) In grade 1, there is segmental deposition of  $\beta$ -amyloid in the meningeal vessel (small arrowhead) and intracerebral arteriole (large arrowhead) which is shown at higher magnification in the inset. (B) In grade 2, there is circumferential deposition of  $\beta$ -amyloid as noted in 3 meningeal vessels and one intracerebral arteriole. There is progressively greater involvement of vessels in Grade 3 (C) and grade 4 shows maximal vessel involvement with a single field showing  $\beta$ -amyloid deposition in 4 meningeal and about 18 intracerebral vessels. Scale bar=200  $\mu$ m

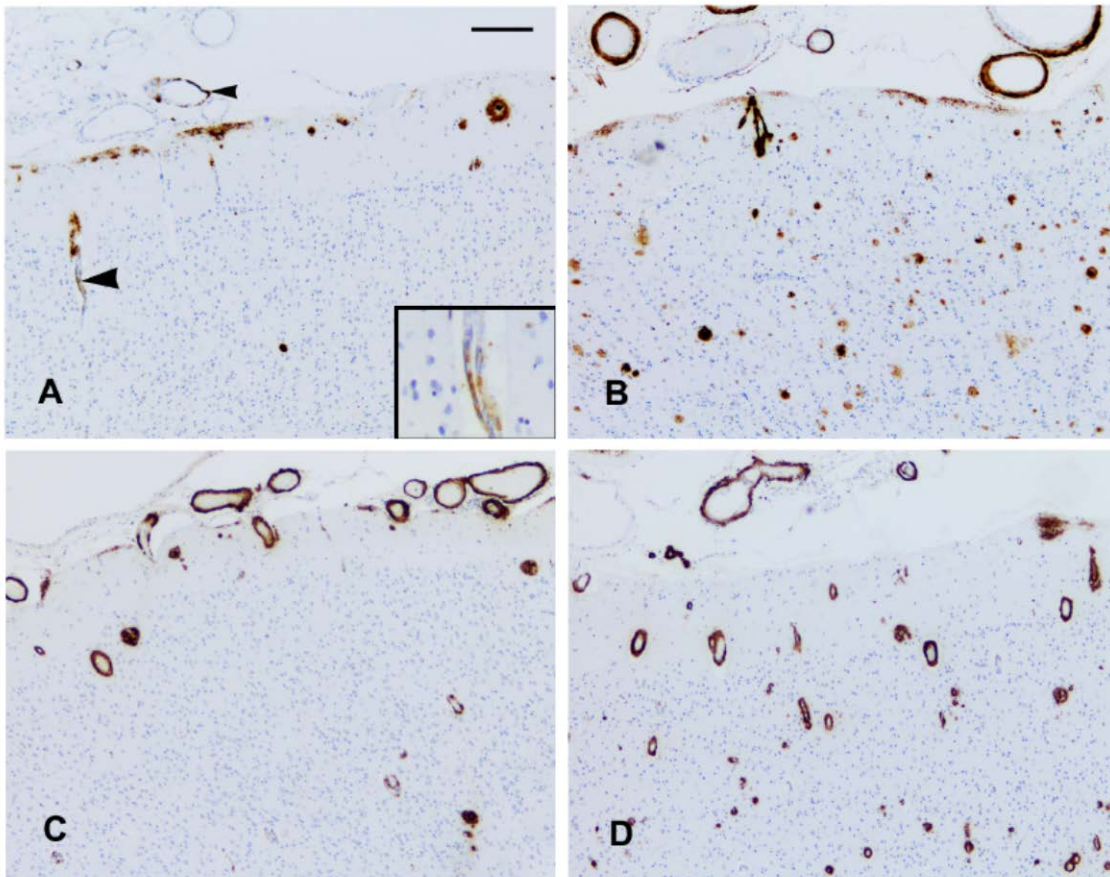

Supplement: supp_WNL.0000000000002175_Supplemental_data.pdf [file supp_WNL.0000000000002175_Supplemental_data.pdf]
